## Doderlin: Isolation and Characterization of a Broad-Spectrum Antimicrobial Peptide from *Lactobacillus acidophilus*

1 Bruna S. da Silva<sup>1,2\*</sup>, Andrea Díaz-Roa<sup>1,3</sup>, Erica S. Yamane<sup>4</sup>, Mirian A. F. Hayashi<sup>4</sup>, Pedro Ismael  
2 da Silva Junior<sup>1,2\*</sup>

3 <sup>1</sup>Laboratory for Applied Toxinology (LETA) - Center of Toxins, Immune-Response and Cell  
4 Signaling – CeTICS/CEPID, Butantan Institute, São Paulo CEP 05503-900, SP, Brazil

5 <sup>2</sup>Post-Graduation Program Interunits in Biotechnology, USP/IBu/IPT - Institute of Biomedical  
6 Sciences, Uni-versity of São Paulo, São Paulo CEP 05508-900, SP, Brazil

7 <sup>3</sup>Escuela de Ciencias Agrícolas, Pecuarias y del Medio Ambiente (ECAPMA), Universidad Nacional  
8 Abierta y a Distancia (UNAD), Bogotá 110111, Colombia; [andrea.diaz@unad.edu.co](mailto:andrea.diaz@unad.edu.co)

9 <sup>4</sup>Pharmacology Department, Escola Paulista de Medicina (EPM), Universidade Federal de São Paulo  
10 (UNIFESP), São Paulo CEP 04044-020, Brazil; [mhayashi@unifesp.br](mailto:mhayashi@unifesp.br)

11  
12 Corresponding Author  
13 [pedro.junior@butantan.gov.br](mailto:pedro.junior@butantan.gov.br) and [mab\\_bru@hotmail.com](mailto:mab_bru@hotmail.com)

14

15 **ABSTRACT** *Lactobacillus acidophilus* are Gram-positive bacteria distributed in diverse  
16 environments, and as being a component of the normal microbiota of gastrointestinal and urogenital  
17 tract, being relevant to humans. Classified as lactic acid bacteria, due to the pro-duction of lactic acid,  
18 *Lactobacillus* can also produce antimicrobial peptides (AMPs), which is a compound synthesized by  
19 all forms of life aiming for protecting themselves from threats and to increase their competitiveness to  
20 survive in a specific environment. AMPs are molecules capable of inhibiting the growth of  
21 microorganisms and, due to the indiscriminate use of conventional antibiotics and the emergence of  
22 multi-resistant bacteria, they have become an alternative, not only for treating multi-resistant  
23 infections, but also for probiotic product confection and food conservation. Considering the rampant  
24 rise of resistance, the present study aimed to isolate and characterize antimicrobial peptides from  
25 *Lactobacillus acidophilus* extracts. Samples were obtained from *Lactobacillus* acid extract  
26 supernatant which was pre-fractionated on disposable cartridges, followed by a high-performance  
27 liquid chromatography (HPLC). The collected fractions were evaluated in a liquid growth inhibition  
28 assay where eight fractions antimicrobial activity were obtained. One of them was selected for further  
29 characterization by mass spectrometry (MS), due to its antimicrobial activity against *Candida*  
30 *albicans* and conclusive results in mass spectrometry analysis. This molecule was identified as a  
31 peptide having a molecular mass of 1788.01 Da, peptide sequence NEPTHLLKAFSKAGFQ, and  
32 named Doderlin. Interestingly, antimicrobial molecules isolated from *L. acidophilus* have already  
33 been described previously, but few reports in the literature describe an AMP effective against *C.*  
34 *albicans* as reported here. The results obtained suggest that this newly discovered molecule have a  
35 biological property with potential to be applied in pharmaceutical and food companies in the fight  
36 against contamination and/or for treating infections caused by microorganisms.

37

38 **IMPORTANCE** Doderlin, this newly discovered molecule have a biological property with potential  
39 to be applied in pharmaceutical and food companies in the fight against contamination and/or for  
40 treating infections caused by microorganisms.

41 **KEYWORDS** *Lactobacillus acidophilus*; lactic acid bacteria; antimicrobial.

42

## 43 **Introduction**

44 The lactic acid bacteria are a very diverse group of Gram-positive fermenting human-  
45 associated bacteria as members of their normal microbiota, some of them also known as probiotics  
46 (1). As typical characteristics this bacteria is a catalase negative, non-spore-forming anaerobic, cocci  
47 or bacillus format, lacking locomotion structures and cytochromes (2, 3). Among the benefits of  
48 using probiotics are the aid in preventing diarrhea, infectious diseases and stomach ulcers, decreased  
49 lactose intolerance and allergies, stimulation of intestinal and systemic immunity, antimicrobial  
50 activity, inhibitory action against some cancers and control of cholesterol levels (4-6).

51 The beneficial effects of *Lactobacillus* come from the production of a large number of active  
52 metabolites which assist them in rivalry with other microorganisms that occupy the same ecological  
53 niche. Among these metabolites are: organic acids (lactic acid, acetic acid and other short chain),  
54 hydrogen peroxide, carbon dioxide, low molecular weight antimicrobial substances, bacteriocins and  
55 bacteriocin-like substances (7). These metabolites, especially hydrogen peroxide and lactic acid, from  
56 *Lactobacillus* are also routinely employed in many industrial processes including the production of  
57 fermented foods such as vegetables, meats and dairy products (milk, yogurt and cheese) (8, 9).

58 Among the species belonging to the group of *Lactobacillus* stand out the *Lactobacillus*  
59 *acidophilus*. These bacteria are present in the human oral, gastrointestinal and urogenital mucosa,  
60 where they adhere to the epithelium and alter their environment in such a way that colonization by  
61 other bacteria or fungi through competition for resources, predation by bacteriophage and production  
62 of inhibitory metabolites is difficult (10-12).

63 Also known as Döderlein's bacilli, *L. acidophilus* was first described by Professor Albert  
64 Döderlein in 1892. In his pioneering studies on bacteria present in vaginal secretions, Döderlein  
65 characterized such organisms as Gram-positive, fermenter, non-spore-forming and unflagged bacteria  
66 (10, 13, 14). He also noted that the bactericidal activity of vaginal secretions was associated with  
67 lactic acid production due to the fermentation process performed by the bacilli (15). *L. acidophilus*  
68 is the most abundant bacteria in these environments, and a member of the normal gut and vagina  
69 microbiota (16, 17). Its role in the human intestinal microbiota is to assist the level of harmful  
70 bacteria and fungi lowering and to produce lactase, which is an important enzyme in milk digestion  
71 (18). The presence of lactic acid, produced by both *L. acidophilus* and the vaginal mucosa, lowers the  
72 local pH to about 4.0 and 4.5, creating an environment that limits the growth of other bacteria (14). *L.*  
73 *acidophilus*, as well as all *Lactobacillus*, basically present two ways of interference against  
74 pathogens: (1) adherence to the epithelium forming a barrier that prevents colonization, leading to  
75 competition for receptors present in epithelial cells, or (2) the production of antimicrobial  
76 compounds, such as acids hydrogen peroxide, bacteriocins and antimicrobial peptides (AMPs) (10,  
77 19, 20).

78 AMPs compose a class of compounds highly heterogeneous that are generally defined as small  
79 (cationic, ranging from 5 to 100 amino acid residues) molecules with high proportion of hydrophobic  
80 residues and high-water solubility, which are properties that allow the necessary interactions of  
81 AMPs to activate their mechanisms of action (21, 22).

82 Native AMPs are one of the most important defense systems in either prokaryotic or eukaryotic  
83 organisms, showing a highly diverse composition, and a dual anti-inflammatory and antimicrobial  
84 effect has been described for the most known AMPs. Thousands of native and chemically

85 synthesized AMPs were discovered and reported (23, 24). In prokaryotes, which have a simpler  
86 structure compared to eukaryotes and with no immune system, AMPs confer an ecological advantage  
87 in competition for resources necessary for survival, especially with a strong activity against  
88 organisms that occupy a similar niche or habitat (25).

89 The typical mechanism of action of an AMP usually involves the electrostatic interaction with  
90 the plasma membrane, followed by the formation of pores that lead to intracellular content leakage  
91 and, consequently, to the cell death (26-28). However, some peptides can interact to intracellular  
92 targets, like nucleic acids, as suggest in *in vitro* studies with Sarconesin II (29) and Rondonin (30).

93 The indiscriminate use of antibiotics and the emergence of multidrug-resistant bacteria has  
94 rekindled the interest in AMPs, which was overshadowed by the era of antibiotics that began in 1928  
95 with Alexander Fleming's discovery of penicillin (31). Antibiotics were a great discovery of the  
96 twentieth century, but they are losing their effectiveness increasingly due to the evolution of  
97 microbial resistance mechanisms (32). This topic is so worrisome that it made the United Nations  
98 include it on the list of greatest health threats in 2019.

99 In this context, the present work is focused on bioprospection and functional and structural  
100 characterization of a novel short peptide. Natural sources, including bacteria, are excellent samples  
101 for this purpose. Despite its moderate and broad-spectrum antimicrobial activity, this study presents a  
102 unique sequence that can be modified, and explored in future structure-function studies. Additionally,  
103 the selectivity evidenced by the absence of hemolytic activity at high concentrations is a determining  
104 factor for translation to *in vivo* studies.

## 105 **RESULTS**

### 106 ***Identification and isolation of the active fraction/compound from the *Lactobacillus acidophilus**** 107 ***extracts***

108 Several fractions were eluted from *Lactobacillus acidophilus* extracts which were all  
109 submitted to the liquid growth inhibition assay against Gram-positive, Gram-negative, and yeasts,  
110 aiming for the identification of the fractions with antimicrobial activity. Only the samples eluted at 5  
111 and 40% ACN concentration presented antimicrobial activity. The fractions eluted at 80% ACN did  
112 not show any antimicrobial activity. A total of eight fractions inhibited the growth of the tested  
113 microorganisms. Four fractions were eluted at 5% ACN (acetonitrile), numbered 3, 12, 14, and 15  
114 (Figure 1A), while other four were eluted at 40% ACN: 23, 25, 29, and 32 (Figure 2A). The  
115 corresponding antimicrobial fractions and the microorganisms inhibited by them are depicted  
116 summarized in Table 1.

117 Fractions identified as having antimicrobial potential were carried out to a second  
118 chromatography step in order to verify the homogeneity of the samples. In this step, the samples were  
119 selected based on the antimicrobial activity against the yeast *Candida albicans*, which is an  
120 opportunistic fungus of medical relevance affecting the human female genital tract, and the fractions  
121 12 (eluted at 30.8- 32.3 min), and 29 (eluted at 37.6 min) were then selected. Fraction 12 (Figure 1B)  
122 was apparently homogeneous, while from the fraction 29 were eluted four main peaks (Figure 2B).  
123 These samples were submitted again to the liquid growth inhibition assay to ensure that the  
124 antimicrobial activity remained even after this new fractionation process, and only fraction 12 was  
125 homogeneous and conserved the same antimicrobial activity observed in the first assay (Table 1).  
126 Therefore, it was selected for the characterization steps.

### 127 128 ***Mass spectrometry (MS) and characterization of the compound with antimicrobial activity*** 129

130 The mass spectrometry (MS) analysis of the fraction 12 highlighted the prominent ion  
131 corresponding to a molecular weight (MW) of 664 Da besides other ions, indicating a probable MW

132 above 1 kDa (Figure 3). Due to the presence of these ions, a new step of liquid chromatography was  
133 performed using a gel-filtration column to separate the samples by their size.

134 This new chromatographic profile detected two different fractions which were eluted from the  
135 fraction 12, numbered 1 and 2 (Figure 4). Both samples were subjected to MS analysis again,  
136 allowing to identify one fraction (1) with a molecular weight of 664 Da m/z (already identified in the  
137 first MS step, Figure 5B) and the other, fraction (2), corresponding to a molecule with 1,788 Da m/z  
138 (Figure 5A). Both samples were retested for the antimicrobial activity, but only the 1,788 Da  
139 molecule presented antimicrobial activity similar to that described initially in Table 1.

140 Analysis using the in-house MASCOT tool allowed identifying the primary sequence  
141 NEPTHLLKAFSKAGFQ for this molecule (Figure 6A), which was drawn using the PepDraw tool as  
142 shown in (Figure 6B). This sequence was named Doderlin, in honor to the responsible for the  
143 discovery of the vaginal bacilli Dr. Albert Döderlein. In addition, as the native purified molecule  
144 isolated from the *Lactobacillus acidophilus* extracts has limited quantitative recovery due to the  
145 several fractionation steps necessary for the complete purification process, the full-length analog was  
146 chemically synthesized and commercially purchased.

147

## 148 **Bioassays**

149

### 150 **Antimicrobial spectrum analysis of chemically synthesized Doderlin**

151

152 A liquid growth inhibition assay was performed again with the chemically synthesized  
153 Doderlin to confirm and extend the knowledge on the antimicrobial spectrum of this peptide.

154 Among the microorganisms evaluated here, Doderlin was ineffective against most Gram-  
155 negative bacteria and filamentous fungi tested here (Table 2). On the other hand, Doderlin showed a  
156 wide spectrum of antimicrobial action against Gram-positive bacteria and yeasts (Table 2).

157 In the same experiment (2.2.1) was also possible to determine the minimum inhibitory  
158 concentration (MIC) of the Doderlin (Table 3), applying the sample in serial dilution starting from  
159 the concentration of 464 µg/mL to 29 µg/mL. Were observed that the minimum concentration to  
160 inhibit *Candida albicans* IOC 4558, *Candida tropicalis* IOC 4560, and *Streptococcus agalactiae*  
161 ATCC12386, were exactly corresponds to the maximum concentration applied in the test (464  
162 µg/mL). Also, was possible to note that the most tested microorganisms had their growth inhibited at  
163 116 µg/mL, and the lowest inhibitory concentration detected was 29 µg/mL, against the Gram-  
164 negative bacteria *Pseudomonas aeruginosa* ATCC 27853.

165

### 166 **Hemolytic activity**

167

168 Hemolytic activity was applied to determining the amount of human hemoglobin released  
169 after incubation with Doderlin. No hemolysis was observed at the evaluated concentrations,  
170 indicating that Doderlin does not have the ability to generate hemolysis in human red blood cells  
171 (Figure 7).

172

### 173 **Physicochemical properties and structural analysis**

174

175 The ExPASy tool (SIB Bioinformatics Resource Portal) was used to predict the  
176 physicochemical properties of Doderlin (Table 4). This peptide was predicted to have six out of 16  
177 hydrophobic amino acid residues, in which: two were Leu (L), two were Ala (A), and two were Phe  
178 (F) residues, with a total positive net charge (+ 1) and a high basic nature (p.I. 9.53). The Doderlin



179 instability index was calculated, showing a value of 16.11 and suggesting that this molecule is a  
180 stable peptide (instability index < 40).

181 The relative volume occupied by aliphatic side chains of a protein is termed as aliphatic index  
182 (AI). This index is important in the protein thermal stability prediction since a high AI implies in a  
183 more thermally stable protein. The AI of Doderlin is in the range of 61.25, indicating this peptide is  
184 thermally stable.

185 GRAVY (grand average of hydropathicity) index is related to the solubility of the proteins,  
186 indicating a hydrophobic (positive GRAVY) or hydrophilic (negative GRAVY) molecule. Doderlin  
187 presented a negative GRAVY index, suggesting it is hydrophilic and, therefore, highly soluble in  
188 water. Doderlin secondary structure was also predicted based on its primary sequence using the I-  
189 TASSER software, which showed a typical  $\alpha$ -helix structure for this peptide (Figure 6).

190

## 191 DISCUSSION

192 In the present study, we showed the isolation and characterization of active biomolecules from  
193 the extract of the *Lactobacillus acidophilus* cultures. Several fractions were obtained by employing  
194 the reverse phase high-performance liquid chromatography (RP-HPLC) technique, from which eight  
195 presented antimicrobial activity. These findings are in good agreement with the expected  
196 antimicrobial activity, once *Lactobacillus* sp was reported as a good source of antimicrobial peptides  
197 (AMPs) and bacteriocins (33-35).

198 In general, Prokaryotic AMPs have a narrow inhibitory spectrum, which is usually restricted to  
199 the microorganisms closely related to the producing bacteria (25, 36). The inhibition of growth in  
200 antimicrobial assays, as performed in this study, showed that four fractions have a more restricted  
201 antimicrobial activity, such as the fraction 3, which was effective solely against the Gram-positive  
202 *Micrococcus luteus*, and also the fractions 23, 25, and 32, which were effective only against the  
203 Gram-negative *Escherichia coli* (Table 1).

204 Precisely, as the antimicrobial molecules provide a competitive advantage which helps the  
205 organism to maintain its population by reducing the potential competitors, and the specificity of these  
206 peptides makes them promising antimicrobial agents with several industrial applications (31, 37).  
207 However, it is important to highlight that more tests are still needed to confirm the specificity of  
208 these molecules, since the amount obtained after the fractionation processes did not allow us to carry  
209 out that many tests necessary to clarify this point.

210 Besides the *L. acidophilus* antimicrobial molecules effect against Gram-positive bacteria, as  
211 expected to a lactic acid bacteria antimicrobial molecule, inhibition of Gram-negative bacteria growth  
212 was already reported (38, 39). Acidocin AA11 and Acidocin 1B are good examples of *L. acidophilus*  
213 isolated antimicrobial molecules that presents a broader spectrum of action, affecting members of the  
214 *Lactobacillus* genus and other Gram-positives bacteria, as expected to a LAB antimicrobial molecule,  
215 although not restricted to them, also affecting Gram-negative bacteria (40, 41).

216 Similarly, in the present study we observed the inhibition of Gram-negative bacteria, such as *E.*  
217 *coli* by the fractions 15, 23, 25, 29, and 32, and the inhibition of *P. aeruginosa* by the fractions 12  
218 and 14. These microorganisms are opportunistic pathogens that causes several infections and are  
219 largely reported as multidrug resistant microorganisms (42, 43). While *E. coli* is associated to human  
220 gastrointestinal and urinary tract infections, peritonitis, bacteraemia and neonatal meningitis (44), *P.*  
221 *aeruginosa*, beyond respiratory infections, can also cause infections in the human urinary and  
222 gastrointestinal tracts, and bacteraemia (45), including chronic lung infections in  
223 immunocompromised individuals (46). In addition to the human infection, *P. aeruginosa* strains can  
224 also affect both livestock and pet animals, for instance, causing otitis and urinary tract infections in  
225 dogs, mastitis in dairy cows, or endometritis in horses (47). Therefore, the discovery of these new  
226 seven antimicrobial molecules has clear relevance and potential in biotechnology.

227 Among the eight antimicrobial fractions obtained, Doderlin (both native and synthetic version)  
228 was proven to be one of the most interesting, due to its conclusive results in chromatographic  
229 and mass spectrometry analysis, as well as its broad-spectrum inhibition, especially against *C.*  
230 *albicans*, which represents an important opportunistic pathogen that causes candidiasis (48). Trials  
231 using two *Lactobacillus* isolated from honey, the *L. plantarum* and the *L. curvatus*, proved the  
232 potential of these bacteria genus against several *Candida* species (49). Also, *L. acidophilus* are good  
233 producers of diverse antimicrobial substances. Some organic metabolites extracted of clinical isolates  
234 *L. acidophilus*, like lactic acid, hydrogen peroxide, and diacetyl have been tested and already  
235 demonstrated to be effective antifungal against *C. albicans* (50).

236 In a similar study, *Lactobacillus pentosus* TV35b isolated from vaginal secretions allowed the  
237 extraction of the Pentocin TV35b, which is a bacteriocin-like peptide with a broad inhibition  
238 spectrum with the capability to affect the *C. albicans* growth (51). Other reports also demonstrated  
239 the effectivity of antimicrobial substances against *C. albicans* using bacteriocins produced by  
240 *Streptococcus salivarius*, *Enterococcus faecalis*, and bacteriocins derived from protein cleavage of  
241 bovine secretion (52-54).

242 Despite that, this work is unique to report a native AMP from *L. acidophilus* which is  
243 effective against *C. albicans*. This is really relevant not only because of the fact that *C. albicans* is  
244 the major responsible for *Candida* infections, but also because of the increasing number of emerging  
245 *Candida* spp resistant to azoles, such as fluconazole (FLU), the standard antifungal used for treating  
246 these infections (55, 56). In this context, Doderlin could be an important ally in combating these  
247 *Candida* infections, especially because the synthetic version of this molecule also effectively  
248 inhibited three different strains of *Candida* (Table 2).

249 The assays with the synthetic Doderlin were crucial because of the limited amount of native  
250 molecule obtained after the purification from the *L. acidophilus* extracts. However, these assays were  
251 consistent with the native Doderlin antimicrobial assays, once both molecules were able to inhibit the  
252 growth of the same microorganisms used at the first antimicrobial assay and allowed to expand the  
253 knowledge about the antimicrobial spectrum of Doderlin.

254 Another promisor antimicrobial effect observed for Doderlin was the inhibition of the  
255 *Cryptococcus neoformans* growth, which is an opportunistic yeast-like fungal pathogen able to  
256 cause a disease that causes high morbidity and mortality in immunocompromised population, and  
257 urgently require new treatment strategies, as the cryptococcal meningitis (57), (58).

258 There are few reports in the literature describing AMPs with antifungal activity against  
259 *Cryptococcus*, and none of them was extracted from bacteria. However, in a following study a *de*  
260 *novo* designed peptide, VG16KRKP, with high potency against *C. albicans* and *C. neoformans* was  
261 developed (59). Subsequently, these authors explored the mode of action of this peptide, showing  
262 that it kills the fungal cells mainly through membrane disruption, leading to the efflux of cell content,  
263 and also using intracellular targets as a secondary mode of action (60). The mode of action of  
264 Doderlin still need further investigation, but giving its physicochemical characteristics, as described  
265 here, it is possible to hypothesize that this peptide may also act through these two modes of action as  
266 well.

267 Regarding to the inhibition of bacterial growth, the results obtained here for Doderlin were  
268 similar to those previously reported for a bacteriocin from the extracts of the *L. acidophilus* ks400,  
269 which was effective against *Streptococcus agalactiae* and *Pseudomonas aeruginosa* (61), as noticed  
270 for Doderlin herein. Moreover, the antimicrobial activity of Doderlin against *Streptococcus*  
271 *agalactiae* is very relevant, considering that this is one of the most relevant opportunistic pathogens  
272 related to vaginal infections and also the leading cause of neonatal disease worldwide (62).

273 On one hand, synthetic Doderlin assays allowed to expand the knowledge about its  
274 antimicrobial spectrum, and on the other, relative high concentration of the peptide was required to  
275 affect the growth of tested microorganisms.

276 In general, the majority of previous works described very low MIC values for antimicrobial  
277 molecules (63, 64), in which bacteriocins isolated from *Lactobacillus* displayed MIC ranges from 0.8

278  $\mu\text{g/mL}$  to 23  $\text{ng/mL}$  against diverse microorganisms. Nevertheless, comparing the MIC values of  
279 Doderlin, against similar microorganisms, to some other *Lactobacillus* broad-spectrum antimicrobial  
280 substances, it seems that the MIC values do not differ significantly. An example is the comparison  
281 of the MIC values necessary to the *S. aureus* and *M. luteus* growth inhibition. The NX2-6 bacteriocin  
282 inhibited the growth of mentioned bacteria at a concentration of 80 and 120  $\mu\text{g/mL}$ , respectively (65),  
283 while Doderlin MIC were 116  $\mu\text{g/mL}$  for both bacteria. Moreover, a bacteriocin like-substance from  
284 *L. plantarum*, the LBP102, also inhibited *S. aureus* at the concentration of 70  $\mu\text{g/mL}$  (66), which is  
285 not considerably lower than the Doderlin minimum concentration.

286 Surprisingly, the MIC of Doderlin against *C. albicans* was one of the highest observed (above  
287 200  $\mu\text{g/mL}$ ), whereas the most notable Doderlin MIC value was against *P. aeruginosa* at 29  $\mu\text{g/mL}$ ,  
288 which was lower than the 70  $\mu\text{g/mL}$  observed in the study with the antimicrobial substance LBP102  
289 (66). Indeed, this MIC value for Doderlin is still low even if compared to some AMPs, like the  
290 OVTP12, a peptide derived from egg tested against the same *P. aeruginosa* strain used in the present  
291 study, but effective in a higher concentration (128  $\mu\text{g/mL}$ ) than Doderlin (67).

292 Some physicochemical parameters of Doderlin were also explored. Indeed, physicochemical  
293 properties and the sequence of peptides can directly affect their functions, bioavailability and  
294 bioaccessibility, once that they are released from the precursor protein where they are encrypted (68).  
295 The MW of the peptide NEPTHLLKAFSKAGFQ is 1788.01 Da, and the net charge was predicted to  
296 be positive, a known evidence of membrane electrostatic interaction, that facilitates the initial binding  
297 of the positively charged peptides to the negatively charged bacterial membrane (69). Similarly,  
298 peptide hydrophobicity will also influence the uptake and bioactivity of peptides (70).

299 The instability index (II) predicted classifies Doderlin as a stable peptide (71). PepDraw server  
300 predicted the hydrophobicity of the peptide Doderlin as +18.16  $\text{kcal mol}^{-1}$  with the Wimley-White  
301 scale. This peptide has a good solubility in water, and the grand average of hydropathicity (GRAVY)  
302 of this peptide is -0.512, which indicates that this peptide is hydrophilic; these properties were also  
303 previously observed for the AVYPYQR novel casein anticoagulant peptide  
304 (<https://www.ncbi.nlm.nih.gov/pubmed/30994118>). Also, Doderlin predicted secondary structure  
305 shows an  $\alpha$ -helix that is commonly reported as a characteristic of AMPs, that usually acts on the  
306 bacteria membrane, in the same way as the human cathelicidin LL-37 (72) and magainin-2 (73).

## 308 CONCLUSIONS

309 The present work allowed the isolation and characterization of novel antimicrobial peptide  
310 (AMP) which was extracted from *Lactobacillus acidophilus* and showed a broad antimicrobial  
311 spectrum (against Gram-positive and negative bacteria, and yeast). The most promising molecule was  
312 purified and characterized, and named Doderlin. Doderlin is more effective against Gram-positive  
313 bacteria and yeasts with a minimum inhibitory concentration (MIC) of 116  $\mu\text{g/mL}$  for the majority of  
314 tested microorganisms. Even though, *P. aeruginosa* was the most sensible bacteria to Doderlin, with  
315 a MIC value of only 29  $\mu\text{g/mL}$ . In addition, the bioinformatic analysis predict Doderlin as a stable  
316 and soluble in water peptide, with  $\alpha$ -helix secondary structure, suggesting it may interact with lipid  
317 membranes. These findings make this molecule very interesting from a biotechnological point of  
318 view and a potential antimicrobial candidate to be applied in food and pharmaceutical industry.  
319 Complementary studies are required to continue the characterization of the other seven antimicrobial  
320 fractions detected, and to compare the differences in efficacy and potency between native and  
321 synthetic Doderlin versions. Also, the mode of action of the peptide needs to be further investigated.

## 323 MATERIALS AND METHODS

### 324 Bacterial strains and growth conditions

325 The *L. acidophilus* strains were collected from the vagina of patients at the São Paulo  
326 Hospital, located at Federal University of São Paulo (UNIFESP). The strains isolation and  
327 identification were also performed by the Hospital's coworkers. Samples were transported on ice to  
328 the Special Laboratory for Applied Toxinology (LETA) at Butantan Institute (São Paulo, Brazil), and  
329 stored at -80 °C in MRS broth containing 20% (vol/vol) glycerol. *The clinical isolated Lactobacillus*  
330 *acidophilus* were cultivated in 10L of the growth media recommended, and kept under agitation at  
331 37°C for 24 h, without aeration until mid-logarithmic phase of growth (O.D.<sub>600</sub> = 0.8).

332 Bacterial and fungal strains used in the antimicrobial assays were: *Candida albicans* MDM8,  
333 *Candida albicans* IOC 4558, *Candida tropicalis* IOC 4560, *Candida glabrata* IOC 4565, *Candida*  
334 *krusei* IOC 4559, *Cryptococcus neoformans* H99, *Cladosporium herbarium* ATCC 26362,  
335 *Aspergillus niger*, *Aspergillus fumigatus*, and *Penicillium expansum* (bread isolated), *Aspergillus*  
336 *niger* A296, *Paecylomyces farinosus* IBC 251, *Streptococcus agalactiae* ATCC12386, *Micrococcus*  
337 *luteus* A270, *Staphylococcus aureus* , *Pseudomonas aeruginosa* ATCC 27853, *Pseudomonas*  
338 *aeruginosa* PA14, *Escherichia coli* DH5-alfa, *Escherichia coli* D31, *Escherichia coli* SBS363 and  
339 mummified spider isolated *Beauveria bassiana*, belonging to the collection of microorganisms of the  
340 Special Laboratory for Applied Toxinology (LETA) of the Butantan Institute (São Paulo, Brazil).

341

### 342 **Production of culture supernatants**

343 After incubation, the whole broth was centrifuged at  $2,110 \times g$  for 15 min at 4 °C, for cells  
344 pelletization. The cells pellets were resuspended in a buffer containing 200 mL of 2M acetic acid,  
345 mixed in a magnetic stirrer for 30 min in the presence of ice. The suspension was lysed by  
346 ultracentrifugation for  $16,000 \times g$  for 30 min at 4 °C to obtain the supernatant.  
347

### 348 **Solid Phase Extraction**

349 The supernatant was partially purified by Sep-Pak C18 cartridges (Waters Associates,  
350 Milford, MA, USA), using three successive acetonitrile (ACN) concentrations in water (5, 40, and  
351 80%). The eluted samples were lyophilized and reconstituted in 2 ml trifluoroacetic acid (0.05%  
352 TFA). Then, it was centrifugated at  $14,000 \times g$  for 2 min to remove the insoluble material before  
353 submitting the material to liquid chromatography.

354

### 355 **Peptide fractionation**

356 The supernatant was fractionated by a reverse-phase high-performance liquid chromatography  
357 (RP-HPLC) at room temperature on a Shimadzu LC-10 HPLC system using a semi-preparative C18  
358 Jupiter column (10 mm; 300A;  $10 \times 250$  mm) (Phenomenex International, Torrance, CA, USA)  
359 equilibrated at room temperature with 0.05% TFA in ultrapure water. The elution was done under a  
360 linear ACN gradient and the flow rate was 1.5 mL/min during 60 min (0-20% for fractions eluted in  
361 5%, 2 - 60% for fractions eluted in 40%, and 20-80% for fractions eluted in 80%). Each fraction was  
362 individually and manually collected, under Ultraviolet (74) absorbance monitored at 225 nm. The  
363 fractions were lyophilized, reconstituted in 500  $\mu$ L ultrapure water, and used in antimicrobial activity  
364 assays.

365 The two fractions with antibacterial activity (12 and 29) were submitted to a second RP-  
366 HPLC step (1 mL/min flow rate during 60 min) using an analytical C18 Jupiter column (10 mm;  
367 300A;  $4.6 \times 250$  mm) (Phenomenex International, Torrance, CA, USA). The ACN concentration  
368 ranged from 0% to 10% (fraction 12) and from 19 to 29% (fraction 29). The antibacterial activity of  
369 each fraction was then tested again.



370 Size-exclusion chromatography (SEC) was employed to the Doderlin isolation in an ÄKTA  
371 purifier 10 (GE Healthcare, Chicago, Illinois, EUA) system, using a Superdexpeptide HR 10/30 (7.5  
372 × 300 mm) (GE Healthcare) column. The sample was reconstituted in ammonium acetate (50 mM)  
373 and centrifugated at 16,000 ×g, for 5 min. Then, the supernatant was submitted to the system under a  
374 1 mL/min flow rate during 36 min and monitoring the absorbance at 280 nm. Eluted fractions were  
375 every minute automatically collected and immediately refrigerated, concentrated in a vacuum  
376 centrifuge SpeedVac Savant (Thermo Fisher Scientific, Waltham, MA, USA) and stored in the  
377 freezer at -20 °C until its usage.

378

### 379 ***Antimicrobial Assays***

380 The antimicrobial activities of the fractions were evaluated by a liquid growth inhibition  
381 assay (75, 76). The assay was performed using a serial dilution in 96-wells sterile plates, where each  
382 well was filled with 20 µL of the fraction and 80 µL of bacterial dilution, providing a final volume of  
383 100 µL (77). Bacteria were cultured in poor nutrient broth (PB) (1.0 g peptone in 100 ml of water  
384 containing 86 mM NaCl at pH 7.4; 217 mOsm), and the fungi and yeast were cultured in a poor  
385 potato dextrose broth (1/2-strength PDB) (1.2 g potato dextrose in 100 mL of water at pH 5.0; 79  
386 mOsm). Exponential growth phase cultures were diluted to 5 × 10<sup>4</sup> CFU/mL final concentration.  
387 Sterile water was used as growth control, and streptomycin or tetracycline was used as growth  
388 inhibition control. Plates were incubated for 18 h (bacteria) or 24 h (fungi/yeast) at 30 °C. Growth  
389 inhibition was determined by measuring absorbance at 595 nm using the equipment Victor3 (Perkin  
390 Elmer Inc.). Fractions were tested in triplicate.

391 The Minimum Inhibitory Concentration (MIC) was established according to the previously  
392 described (Section 4.3 and 4.4), using the fraction 12 (Doderlin) in serial dilutions starting from the  
393 initial concentration of 200 µM (432 µg/mL) against Gram-negative bacterial strains, Gram-positive  
394 bacterial s, fungal, and yeast strains. The MIC was defined as the lowest concentration of sample that  
395 caused 100% growth inhibitions, measured by Victor3 spectrophotometer (Perkin Elmer Inc.) at 595  
396 nm.

397

### 398 ***Hemolytic assay***

399 Hemolytic activity of Doderlin was determined using fresh human red blood cells (hRBCs)  
400 donated by a healthy adult, washed three times with phosphate-buffered saline (PBS) (35 mM  
401 phosphate buffer, 0.15 M NaCl, pH 7.4) by centrifugations at 700 ×g for five minutes to a final 3%  
402 (vol/vol) concentration. Doderlin solutions were added to 50 µL hRBC suspension to a final 100 µl  
403 and incubated in a U-shaped bottom plate for 3 h at 37 °C. The sample concentration applied started  
404 from 500 µM (1160 µg/mL) to 0.24 µM (0.557 µg/mL), in serial dilution.

405 Release of hemoglobin was determined by measuring the supernatant absorbance (Abs) at  
406 405 nm and calculated as a percentage of 100% lysis control (0.1% Triton X-100) (Sigma-Aldrich,  
407 St. Louis, MO, USA), following the equation: % hemolysis = (Abs sample - negative Abs)/(positive  
408 Abs - negative Abs). PBS was used as a negative control (78, 79). Assays were done in triplicate. The  
409 Ethics Committee was the University of Sao Paulo School of Medicine (USP), N°  
410 21884919.5.0000.0065.

411

### 412 ***Mass spectrometry analysis and Doderlin identification***

413 Active antibacterial fractions (reconstituted in formic acid 0.1%), were analysed on an LTQ-  
414 Orbitrap Velos (Thermo Scientific) mass spectrometry coupled to an Easy-nLC II liquid nano-  
415 chromatography (Thermo Scientific). Ten µL of each sample were automatically injected on a C18

416 pre-column (100 mm I.D. × 50 mm; Jupiter 10 mm, Phenomenex Inc., Torrance, California, USA)  
417 coupled to a C18 analytical column (75 mm I.D. × 100 mm; ACQUA 5 mm, Phenomenex Inc.), at a  
418 flow rate of 200 nL/min under a linear gradient (from 0 to 95% mobile phase B) (0.1% formic acid in  
419 100% acetonitrile) for 15 min. The electrospray source was operated at 2 kV and 200 °C in positive  
420 ion mode. Mass spectra were acquired by Fourier Transform Mass Spectrometry (FTMS) analyser in  
421 full scan mode (MS), in the range of 200 to 2,000 m/z with a resolution of 60,000 at 400 m/z. The 10  
422 most intense peaks were automatically selected via data dependent acquisition for the subsequent  
423 acquisition of the spectra of the product ions (MS/MS). The minimum threshold for selecting an ion  
424 for a fragmentation event (MS/MS) was set to 5,000 counts per second (cps), and the dynamic  
425 exclusion time was set to 30 s. Normalized collision energy was set to 35%.

426

### 427 **Synthetic Doderlin peptide**

428 Doderlin (amino acid sequence: NEPTHLLKAFSKAGFQ) was synthesized by solid phase  
429 synthesis at China Peptides Co. Ltd (Shanghai, China), with purity of 70%, not amidated.

430

### 431 **Doderlin bioinformatic analysis**

432 The MS/MS peak list files were submitted to an in-house version of the MASCOT server  
433 (Matrix Science, USA) and screened against the NCBI and SwissProt databases. For mass analysis  
434 by the deconvolution of the ions was used the MagTran® Program, version 1.02 (80).

435 The primary structure of the Doderlin was drawn using the PepDraw (<http://pepdraw.com/>)  
436 peptide calculator.

437 Doderlin physicochemical characteristics were evaluated using online peptide calculators.  
438 The theoretical molecular weight, isoelectric point, the peptide charge at pH 7 and extinction  
439 coefficient of the peptide were estimated with the online Pepcalc software (<http://pepcalc.com/>), the  
440 Instability and Aliphatic index was estimated with the ProtParam software  
441 (<https://web.expasy.org/protparam/>), and the I-Tasser tool (<https://zhanglab.ccmb.med.umich.edu/I-TASSER/>)  
442 was used to obtain the Doderlin predicted secondary structure.

443

### 444 **ACKNOWLEDGMENTS**

445 We thank all the team of the Protein Chemistry Laboratory at the Special Toxinology  
446 Laboratory (LETA- Butantan Institute, Brazil) for the constant emotional support and  
447 encouragement, in special to Msc. Soraia Maria do Nascimento, Msc. Thiago de Jesus Oliveira, Msc  
448 Sandra Regina dos Santos, Dr. Débora Álvares Leite Figueiredo and Dr. Katie Cristina Takeuti  
449 Riciluca. Also, we thank the technicians Rosa Maria Carmo, Ismael Feitosa Lima, Ivan Novaski  
450 Avino and Lídia Alves da Silva.

451 **Conflicts of interest.** *The authors declare that the research was conducted in the absence of*  
452 *any commercial or financial relationships that could be construed as a potential conflict of interest.*

453

454 **Author Contributions.** Conceptualization, B.S.S., M.A.F.H. and P.I.S.J.; methodology B.S.S.,  
455 E.SY, M.A.F.H. and P.I.S.J.; software, A.D.R., B.S.S and P.I.S.J.; validation, B.S.S, E.SY, M.A.F.H.  
456 and P.I.S.J.; formal analysis, A.D.R., B.S.S and P.I.S.J.; investigation, B.S.S, E.SY, M.A.F.H. and

457 P.I.S.J.; resources, P.I.S.J.; data curation, A.D.R., B.S.S and P.I.S.J.; writing—original draft  
458 preparation, A.D.R. and B.S.S; writing, review and editing, A.D.R., B.S.S, M.A.F.H. and P.I.S.J.;  
459 supervision, P.I.S.J.; project ad-ministration, P.I.S.J.; funding acquisition, P.I.S.J. All authors have  
460 read and agreed to the pub-lished version of the manuscript.

461 **Funding.** This research was funded by the Research Support Foundation of the State of São  
462 Paulo (FAPESP/CeTICS), grant number 2013/07467-1 and the Brazilian National Council for  
463 Scientific and Technological Development (CNPq), grant number 472744/2012-7 and 134580/2016-8.

464

## 465 REFERENCES

- 466 1. Subbalakshmi C, Sitaram N. Mechanism of antimicrobial action of indolicidin. FEMS microbiology letters.  
467 1998;160(1):91-6.
- 468 2. Axelsson L. Lactic Acid Bacteria: Classification and Physiology. Food science and technology. 2004;139:1-66.
- 469 3. Wood BJB, Warner Pj. Genetics of Lactic Acid Bacteria 2003.
- 470 4. Gilliland SE. Health and nutritional benefits from lactic acid bacteria. FEMS microbiology reviews. 1990;7(1-  
471 2):175-88.
- 472 5. Masood MI, Qadir MI, Shirazi JH, Khan IU. Beneficial effects of lactic acid bacteria on human beings. Critical  
473 reviews in microbiology. 2011;37(1):91-8.
- 474 6. Vuyst Ld, Vandamme EJ. Bacteriocins of lactic acid bacteria : microbiology, genetics, and applications. 1st ed. ed.  
475 London ;: Blackie Academic & Professional; 1994.
- 476 7. Karaoğlu ŞA, Aydin F, Kiliç SS, Kilic A. Antimicrobial activity and characteristics of bacteriocins produced by  
477 vaginal Lactobacilli. Turkish Journal of Medical Sciences. 2003;33:7-13.
- 478 8. Bernardeau M, Vernoux JP, Henri-Dubernet S, Gueguen M. Safety assessment of dairy microorganisms: the  
479 Lactobacillus genus. International journal of food microbiology. 2008;126(3):278-85.
- 480 9. Stiles ME. Biopreservation by lactic acid bacteria. Antonie van Leeuwenhoek. 1996;70(2-4):331-45.
- 481 10. Borges S, Silva J, Teixeira P. The role of lactobacilli and probiotics in maintaining vaginal health. Archives of  
482 gynecology and obstetrics. 2014;289(3):479-89.
- 483 11. Silva M, Jacobus NV, Deneke C, Gorbach SL. Antimicrobial substance from a human Lactobacillus strain.  
484 Antimicrob Agents Chemother. 1987;31(8):1231-3.
- 485 12. Charteris WP, Kelly P, Morelli L, Kevin Collins J. Antibacterial activity associated with Lactobacillus gasseri  
486 ATCC 9857 from the human female genitourinary tract. World Journal of Microbiology and Biotechnology.  
487 2001;17:615-25.
- 488 13. Gomes AMP, Malcata FX. Bifidobacterium spp. and Lactobacillus acidophilus: biological, biochemical,  
489 technological and therapeutical properties relevant for use as probiotics. Trends in Food Science & Technology.  
490 1999;10(4):139-57.
- 491 14. Hickey RJ, Zhou X, Pierson JD, Ravel J, Forney LJ. Understanding vaginal microbiome complexity from an  
492 ecological perspective. Translational research : the journal of laboratory and clinical medicine. 2012;160(4):267-82.
- 493 15. Lash AF, Kaplan B. A Study of Döderlein's Vaginal Bacillus. The Journal of Infectious Diseases. 1926;38(4):333-  
494 40.

- 495 16. Anderson RA, Aroutcheva A, Feathergill KA, Anderson AB. Differential Sensitivity of *Lactobacillus* spp. to  
496 Inhibition by Candidate Topical Microbicides. *Probiotics and antimicrobial proteins*. 2009;1(1):24-35.
- 497 17. Ray B. Probiotics of Lactic Acid Bacteria: Science or Myth? *NATO ASI SERIES H CELL BIOLOGY*.  
498 1996(98):101-36.
- 499 18. Deraz SF, Karlsson EN, Khalil AA, Mattiasson B. Mode of action of acidocin D20079, a bacteriocin produced by  
500 the potential probiotic strain, *Lactobacillus acidophilus* DSM 20079. *Journal of industrial microbiology &*  
501 *biotechnology*. 2007;34(5):373-9.
- 502 19. Boris S, Barbes C. Role played by lactobacilli in controlling the population of vaginal pathogens. *Microbes and*  
503 *infection*. 2000;2(5):543-6.
- 504 20. Fuller R. Probiotics in man and animals. *The Journal of applied bacteriology*. 1989;66(5):365-78.
- 505 21. Li Y, Xiang Q, Zhang Q, Huang Y, Su Z. Overview on the recent study of antimicrobial peptides: origins, functions,  
506 relative mechanisms and application. *Peptides*. 2012;37(2):207-15.
- 507 22. Zhang LJ, Gallo RL. Antimicrobial peptides. *Current biology : CB*. 2016;26(1):R14-9.
- 508 23. Yazici A, Ortucu S, Taskin M, Marinelli L. Natural-based Antibiofilm and Antimicrobial Peptides from  
509 Microorganisms. *Current topics in medicinal chemistry*. 2018;18(24):2102-7.
- 510 24. Wang G, Li X, Wang Z. APD2: the updated antimicrobial peptide database and its application in peptide design.  
511 *Nucleic acids research*. 2009;37(Database issue):D933-7.
- 512 25. Cotter PD, Hill C, Ross RP. Bacteriocins: developing innate immunity for food. *Nature reviews Microbiology*.  
513 2005;3(10):777-88.
- 514 26. Nicolas P. Multifunctional host defense peptides: intracellular-targeting antimicrobial peptides. *The FEBS journal*.  
515 2009;276(22):6483-96.
- 516 27. Nguyen LT, Haney EF, Vogel HJ. The expanding scope of antimicrobial peptide structures and their modes of  
517 action. *Trends in biotechnology*. 2011;29(9):464-72.
- 518 28. Brogden KA. Antimicrobial peptides: pore formers or metabolic inhibitors in bacteria? *Nature reviews*  
519 *Microbiology*. 2005;3(3):238-50.
- 520 29. Díaz-Roa A, Espinoza-Culupú A, Torres-García O, Borges MM, Avino IN, Alves FL, et al. Sarconesin II, a New  
521 Antimicrobial Peptide Isolated from *Sarconesiopsis magellanica* Excretions and Secretions. 2019;24(11):2077.
- 522 30. Riciluca KCT, Oliveira UC, Mendonça RZ, Bozelli Junior JC, Schreier S, da Silva Junior PI. Rondonin:  
523 antimicrobial properties and mechanism of action. 2021;11(9):2541-59.
- 524 31. Hassan M, Kjos M, Nes IF, Diep DB, Lotfipour F. Natural antimicrobial peptides from bacteria: characteristics and  
525 potential applications to fight against antibiotic resistance. *Journal of applied microbiology*. 2012;113(4):723-36.
- 526 32. Steckbeck JD, Deslouches B, Montelaro RC. Antimicrobial peptides: new drugs for bad bugs? Expert opinion on  
527 biological therapy. 2014;14(1):11-4.
- 528 33. Rodríguez-Pazo N, Vázquez-Araújo L, Pérez-Rodríguez N, Cortés-Diéguez S, Domínguez JM. Cell-Free  
529 Supernatants Obtained from Fermentation of Cheese Whey Hydrolyzates and Phenylpyruvic Acid by *Lactobacillus*  
530 *plantarum* as a Source of Antimicrobial Compounds, Bacteriocins, and Natural Aromas. *Applied Biochemistry and*  
531 *Biotechnology*. 2013;171(4):1042-60.
- 532 34. Pavlova AS, Ozhegov GD, Arapidi GP, Butenko IO, Fomin ES, Alemasov NA, et al. Identification of Antimicrobial  
533 Peptides from Novel *Lactobacillus fermentum* Strain. *The Protein Journal*. 2020;39(1):73-84.



- 534 35. Garcia-Gutierrez E, O'Connor PM, Colquhoun IJ, Vior NM, Rodríguez JM, Mayer MJ, et al. Production of multiple  
535 bacteriocins, including the novel bacteriocin gassericin M, by *Lactobacillus gasserii* LM19, a strain isolated from  
536 human milk. *Applied Microbiology and Biotechnology*. 2020;104(9):3869-84.
- 537 36. Gaur YD, Narayan K, Chauhan S, Ali A. Bacteriocinogeny: Concept, nomenclature, prevalence and application.  
538 *Indian Journal of Microbiology*. 2004;44:1-30.
- 539 37. Yang S-C, Lin C-H, Sung CT, Fang J-Y. Antibacterial activities of bacteriocins: application in foods and  
540 pharmaceuticals. *Front Microbiol*. 2014;5:241-.
- 541 38. Aween MM, Hassan Z, Muhialdin BJ, Eljamel YA, Al-Mabrok AS, Lani MN. Antibacterial activity of  
542 *Lactobacillus acidophilus* strains isolated from honey marketed in Malaysia against selected multiple antibiotic  
543 resistant (MAR) Gram-positive bacteria. *Journal of food science*. 2012;77(7):M364-71.
- 544 39. Jamalifar H, Rahimi H, Samadi N, Shahverdi A, Sharifian Z, Hosseini F, et al. Antimicrobial activity of different  
545 *Lactobacillus* species against multi- drug resistant clinical isolates of *Pseudomonas aeruginosa*. *Iranian journal of*  
546 *microbiology*. 2011;3(1):21-5.
- 547 40. Abo-Amer AE. Molecular characterization of antimicrobial compound produced by *Lactobacillus acidophilus* AA11.  
548 *Acta microbiologica et immunologica Hungarica*. 2007;54(2):107-19.
- 549 41. Han KS, Kim Y, Kim SH, Oh S. Characterization and purification of acidocin 1B, a bacteriocin produced by  
550 *Lactobacillus acidophilus* GP1B. *Journal of microbiology and biotechnology*. 2007;17(5):774-83.
- 551 42. Horcajada JP, Montero M, Oliver A, Sorlí L, Luque S, Gómez-Zorrilla S, et al. Epidemiology and Treatment of  
552 Multidrug-Resistant and Extensively Drug-Resistant *Pseudomonas aeruginosa* Infections. 2019;32(4):e00031-19.
- 553 43. Pitout J, DeVinney R. *Escherichia coli* ST131: a multidrug-resistant clone primed for global domination [version 1;  
554 peer review: 2 approved]. 2017;6(195).
- 555 44. Pitout JD, DeVinney R. *Escherichia coli* ST131: a multidrug-resistant clone primed for global domination.  
556 *F1000Research*. 2017;6.
- 557 45. Thaden JT, Park LP, Maskarinec SA, Ruffin F, Fowler VG, Duin Dv. Results from a 13-Year Prospective Cohort  
558 Study Show Increased Mortality Associated with Bloodstream Infections Caused by *Pseudomonas aeruginosa*  
559 Compared to Other Bacteria. 2017;61(6):e02671-16.
- 560 46. Faure E, Kwong K, Nguyen D. *Pseudomonas aeruginosa* in Chronic Lung Infections: How to Adapt Within the Host?  
561 2018;9(2416).
- 562 47. Cabassi CS, Sala A, Santospirito D, Alborali GL, Carretto E, Ghibardo G, et al. Activity of AMP2041 against  
563 human and animal multidrug resistant *Pseudomonas aeruginosa* clinical isolates. *Annals of Clinical Microbiology*  
564 *and Antimicrobials*. 2017;16(1):17.
- 565 48. Kumamoto CA, Gresnigt MS, Hube B. The gut, the bad and the harmless: *Candida albicans* as a commensal and  
566 opportunistic pathogen in the intestine. *Current Opinion in Microbiology*. 2020;56:7-15.
- 567 49. Bulgasem BY, Lani MN, Hassan Z, Wan Yusoff WM, Fnaish SG. Antifungal Activity of Lactic Acid Bacteria  
568 Strains Isolated from Natural Honey against Pathogenic *Candida* Species. *Mycobiology*. 2016;44(4):302-9.
- 569 50. Ogunshe AAO, Omotoso MA, Bello VB. The in vitro antimicrobial activities of metabolites from *Lactobacillus*  
570 strains on *Candida* species implicated in *Candida* vaginitis. *Malays J Med Sci*. 2011;18(4):13-25.
- 571 51. Okkers DJ, Dicks LM, Silvester M, Joubert JJ, Odendaal HJ. Characterization of pentocin TV35b, a bacteriocin-like  
572 peptide isolated from *Lactobacillus pentosus* with a fungistatic effect on *Candida albicans*. *Journal of applied*  
573 *microbiology*. 1999;87(5):726-34.
- 574 52. Ishijima SA, Hayama K, Burton JP, Reid G, Okada M, Matsushita Y, et al. Effect of *Streptococcus salivarius* K12  
575 on the in vitro growth of *Candida albicans* and its protective effect in an oral candidiasis model. *Applied and*  
576 *environmental microbiology*. 2012;78(7):2190-9.

- 577 53. Graham CE, Cruz MR, Garsin DA, Lorenz MC. Enterococcus faecalis bacteriocin EntV inhibits hyphal  
578 morphogenesis, biofilm formation, and virulence of Candida albicans. Proceedings of the National Academy of  
579 Sciences of the United States of America. 2017;114(17):4507-12.
- 580 54. Bellamy W, Wakabayashi H, Takase M, Kawase K, Shimamura S, Tomita M. Killing of Candida albicans by  
581 lactoferricin B, a potent antimicrobial peptide derived from the N-terminal region of bovine lactoferrin. Medical  
582 microbiology and immunology. 1993;182:97-105.
- 583 55. Chowdhary A, Sharma C, Meis JF. Candida auris: A rapidly emerging cause of hospital-acquired multidrug-  
584 resistant fungal infections globally. PLOS Pathogens. 2017;13(5):e1006290.
- 585 56. Zhang M-r, Zhao F, Wang S, Lv S, Mou Y, Yao C-l, et al. Molecular mechanism of azoles resistant Candida  
586 albicans in a patient with chronic mucocutaneous candidiasis. BMC Infectious Diseases. 2020;20(1):126.
- 587 57. Bermas A, Geddes-McAlister J. Combatting the evolution of antifungal resistance in Cryptococcus neoformans.  
588 2020;114(5):721-34.
- 589 58. Mourad A, Perfect JR. Present and Future Therapy of Cryptococcus Infections. 2018;4(3):79.
- 590 59. Datta A, Ghosh A, Airoidi C, Sperandeo P, Mroue KH, Jiménez-Barbero J, et al. Antimicrobial Peptides: Insights  
591 into Membrane Permeabilization, Lipopolysaccharide Fragmentation and Application in Plant Disease Control.  
592 Scientific Reports. 2015;5(1):11951.
- 593 60. Datta A, Yadav V, Ghosh A, Choi J, Bhattacharyya D, Kar Rajiv K, et al. Mode of Action of a Designed  
594 Antimicrobial Peptide: High Potency against *Cryptococcus neoformans*. Biophysical Journal.  
595 2016;111(8):1724-37.
- 596 61. Gaspar C, Donders GG, Palmeira-de-Oliveira R, Queiroz JA, Tomaz C, Martinez-de-Oliveira J, et al. Bacteriocin  
597 production of the probiotic Lactobacillus acidophilus KS400. AMB Express. 2018;8(1):153.
- 598 62. Hayes K, Field D, Hill C, O'Halloran F, Cotter L. A novel bioengineered derivative of nisin displays enhanced  
599 antimicrobial activity against clinical Streptococcus agalactiae isolates. Journal of Global Antimicrobial Resistance.  
600 2019;19:14-21.
- 601 63. Sarikhani M, Kermanshahi RK, Ghadam P, Gharavi S. The role of probiotic Lactobacillus acidophilus ATCC 4356  
602 bacteriocin on effect of HBSu on planktonic cells and biofilm formation of Bacillus subtilis. International Journal of  
603 Biological Macromolecules. 2018;115:762-6.
- 604 64. Nilsen T, Swedek I, Lagenaur LA, Parks TPJA, microbiology e. Novel selective inhibition of Lactobacillus iners by  
605 Lactobacillus-derived bacteriocins. 2020;86(20):e01594-20.
- 606 65. Meng F, Zhu X, Zhao H, Nie T, Lu F, Lu Z, et al. A class  $\alpha$  bacteriocin with broad-spectrum antibacterial activity  
607 from Lactobacillus acidophilus NX2-6 and its preservation in milk and cheese. Food Control. 2021;121:107597.
- 608 66. Lin T-H, Pan T-M. Characterization of an antimicrobial substance produced by Lactobacillus plantarum NTU 102.  
609 Journal of Microbiology, Immunology and Infection. 2019;52(3):409-17.
- 610 67. Ma B, Guo Y, Fu X, Jin Y. Identification and antimicrobial mechanisms of a novel peptide derived from egg white  
611 ovotransferrin hydrolysates. LWT. 2020;131:109720.
- 612 68. Sánchez A, Vázquez A. Bioactive peptides: A review. Food Quality and Safety. 2017;1(1):29-46.
- 613 69. Tu M, Liu H, Cheng S, Mao F, Chen H, Fan F, et al. Identification and characterization of a novel casein  
614 anticoagulant peptide derived from in vivo digestion. Food & function. 2019;10(5):2552-9.
- 615 70. Mora L, Gallego M, Toldrá F. ACEI-Inhibitory Peptides Naturally Generated in Meat and Meat Products and Their  
616 Health Relevance. 2018;10(9):1259.

- 617 71. Guruprasad K, Reddy BVB, Pandit MW. Correlation between stability of a protein and its dipeptide composition: a  
618 novel approach for predicting in vivo stability of a protein from its primary sequence. *Protein Engineering, Design*  
619 *and Selection*. 1990;4(2):155-61.
- 620 72. Xhindoli D, Pacor S, Benincasa M, Scocchi M, Gennaro R, Tossi A. The human cathelicidin LL-37 — A pore-  
621 forming antibacterial peptide and host-cell modulator. *Biochimica et Biophysica Acta (BBA) - Biomembranes*.  
622 2016;1858(3):546-66.
- 623 73. Zasloff M. Magainins, a class of antimicrobial peptides from *Xenopus* skin: isolation, characterization of two active  
624 forms, and partial cDNA sequence of a precursor. 1987;84(15):5449-53.
- 625 74. Gouveia RV, Novelli IA, Vieira FM, Sousa BMD. Morphological variation of *Philodryas patagoniensis* (Girard,  
626 1858) (Serpentes, Dipsadidae) from Brazil, based on the study of pholidosis, coloration and morphometric features.  
627 *Biota Neotropica*. 2017;17.
- 628 75. Bulet P. Strategies for the discovery, isolation, and characterization of natural bioactive peptides from the immune  
629 system of invertebrates. *Methods in molecular biology* (Clifton, NJ). 2008;494:9-29.
- 630 76. Wiegand I, Hilpert K, Hancock REW. Agar and broth dilution methods to determine the minimal inhibitory  
631 concentration (MIC) of antimicrobial substances. *Nature Protocols*. 2008;3(2):163-75.
- 632 77. Silva PI, Jr., Daffre S, Bulet P. Isolation and characterization of gomesin, an 18-residue cysteine-rich defense  
633 peptide from the spider *Acanthoscurria gomesiana* hemocytes with sequence similarities to horseshoe crab  
634 antimicrobial peptides of the tachyplesin family. *The Journal of biological chemistry*. 2000;275(43):33464-70.
- 635 78. Nan YH, Bang J-K, Jacob B, Park I-S, Shin SY. Prokaryotic selectivity and LPS-neutralizing activity of short  
636 antimicrobial peptides designed from the human antimicrobial peptide LL-37. *Peptides*. 2012;35(2):239-47.
- 637 79. Chaparro E, da Silva PI. Lacrain: the first antimicrobial peptide from the body extract of the Brazilian centipede  
638 *Scolopendra viridicornis*. *International Journal of Antimicrobial Agents*. 2016;48(3):277-85.
- 639 80. Zhang Z, Marshall AG. A universal algorithm for fast and automated charge state deconvolution of electrospray  
640 mass-to-charge ratio spectra. *Journal of the American Society for Mass Spectrometry*. 1998;9(3):225-33.

641

642 **FIGURES**

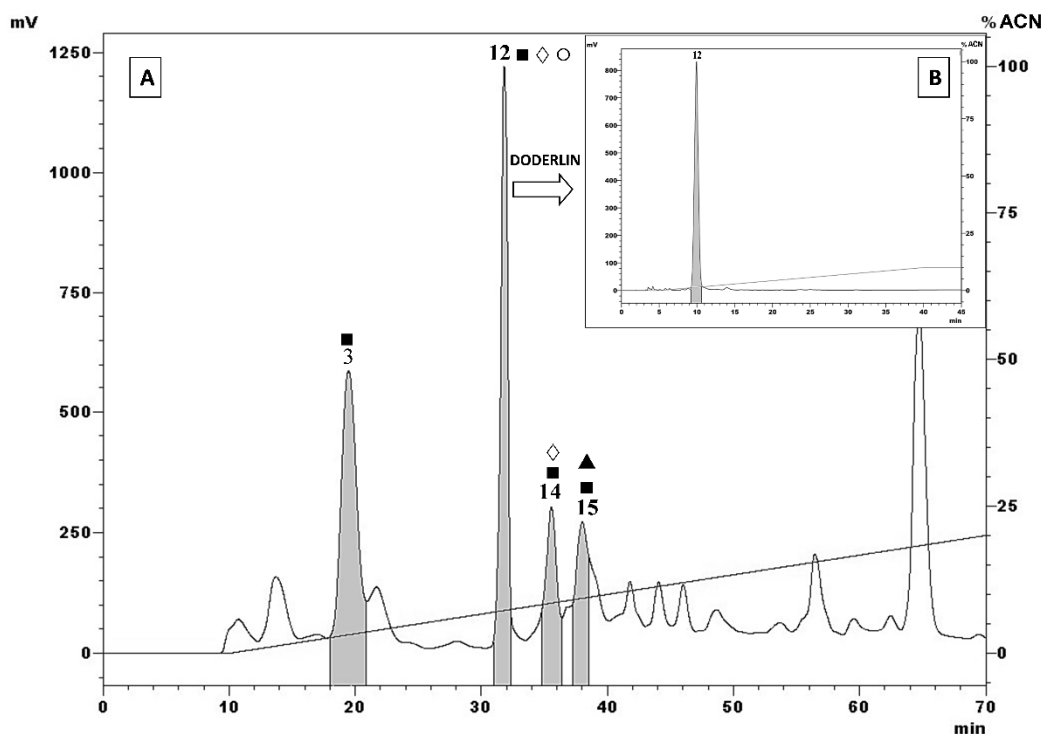

643 **Figure 1.** Reverse-phase high-performance liquid chromatography (RP-HPLC) profile of *Lactobacillus*  
644 *acidophilus* extract eluted at 5% ACN on the Sep-Pak<sup>®</sup> pre-fractionation step. (A). Fractions eluted on a  
645 Jupiter<sup>®</sup> C18 semi-preparative column (10 × 250 mm, 10 μm; 300 Å), with a linear gradient 0%-20% ACN in  
646 acidified water for 60 min, at a flow rate of 1.5 mL/min, monitored at 225 absorbance. The fractions were  
647 manually collected and submitted to the antimicrobial liquid growth inhibition assay. Peaks highlighted  
648 indicate antimicrobial activities against the tested microorganisms: *Micrococcus luteus* A270 (■), *Escherichia*  
649 *coli* SBS 363 (▲), *Pseudomonas aeruginosa* ATCC27853 (◊), and *Candida albicans* MDM 8 (○). The  
650 numbered peak 12 corresponds to the Doderlin sample eluted at 30.8- 32.3 min, and resubmitted to the system  
651 using a Jupiter<sup>®</sup> C18 analytical column (4.6 mm × 250 mm, 10 μm; 300 Å), with a linear gradient 0%-10%  
652 ACN in acidified water for 40 min, at a flow rate of 1 mL/min. The absorbance was monitored at 225 nm (B).



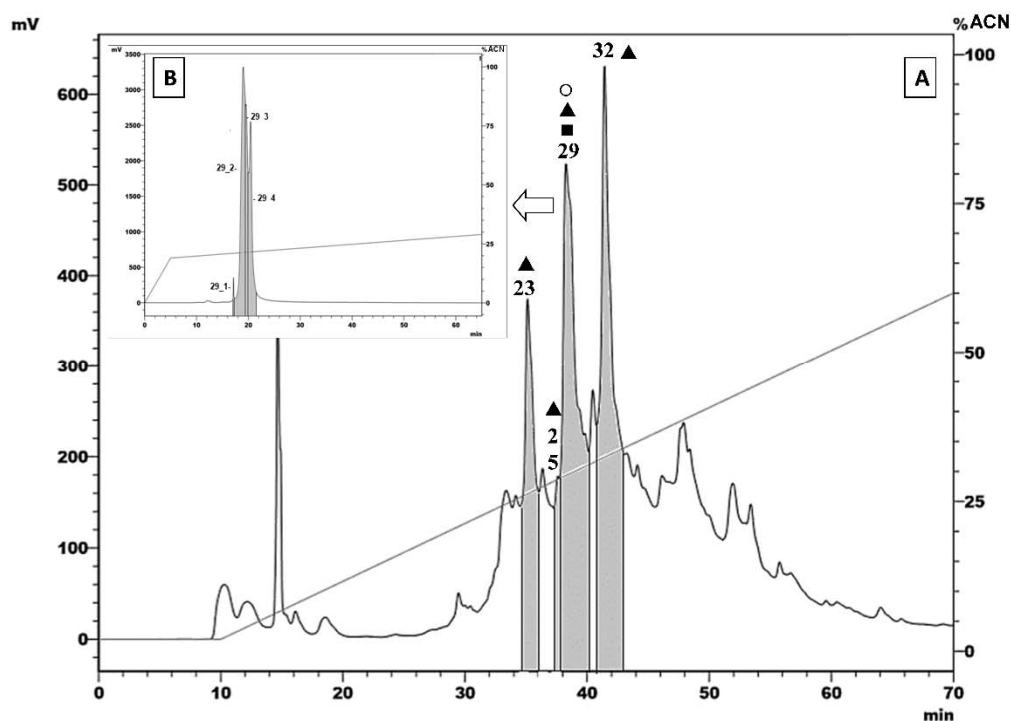

653 **Figure 2.** Reverse-phase high-performance liquid chromatography (RP-HPLC) profile of *Lactobacillus*  
654 *acidophilus* extract eluted at 40% ACN on the Sep-Pak<sup>®</sup> pre-fractionation step. (A). Fractions eluted on a  
655 Jupiter<sup>®</sup> C18 semi-preparative column (10 × 250 mm, 10 μm; 300 Å), with a linear gradient 0-60% ACN in  
656 acidified water for 60 min, at a flow rate of 1.5 ml/min, monitored at 225 absorbance. The fractions were  
657 manually collected and submitted to the antimicrobial liquid growth inhibition assay. Peaks highlighted  
658 indicate antimicrobial activities against the tested microorganisms: *Micrococcus luteus* A270 (■), *Escherichia*  
659 *coli* SBS 363 (▲), and *Candida albicans* MDM 8 (○). The numbered peak 29 corresponds to the sample eluted  
660 at 37.9- 40.3 min, was resubmitted to the system using a Jupiter<sup>®</sup> C18 analytical column (4.6 × 250 mm, 10  
661 μm; 300 Å), with a linear gradient 19-29% ACN in acidified water for 60 min, at a flow rate of 1 mL/min. The  
662 absorbance was monitored at 225 nm (B).

663

664

665

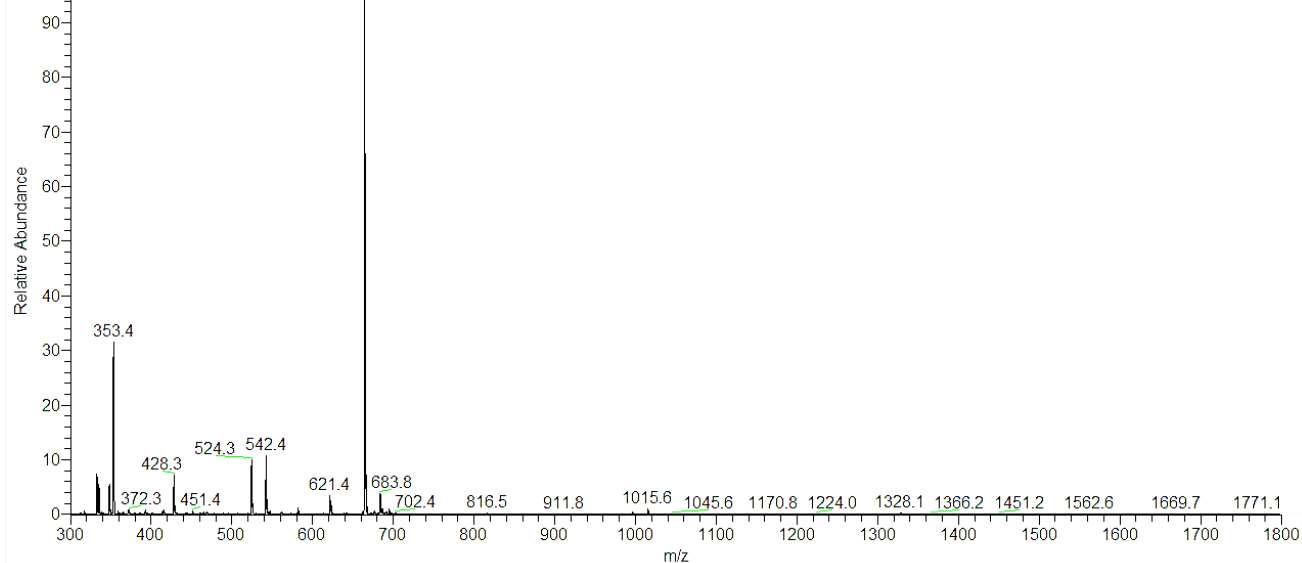

666

667  
668  
669

**Figure 3.** Full MS spectrum of fraction 12 generated by Xcalibur<sup>®</sup> software. Obtained spectrum evidencing the most prominent ion with 664.4 m/z (mass/charge ratio), and visible ions with higher than 1,000 m/z, indicating that the molecule mass could be more than 1 kDa.

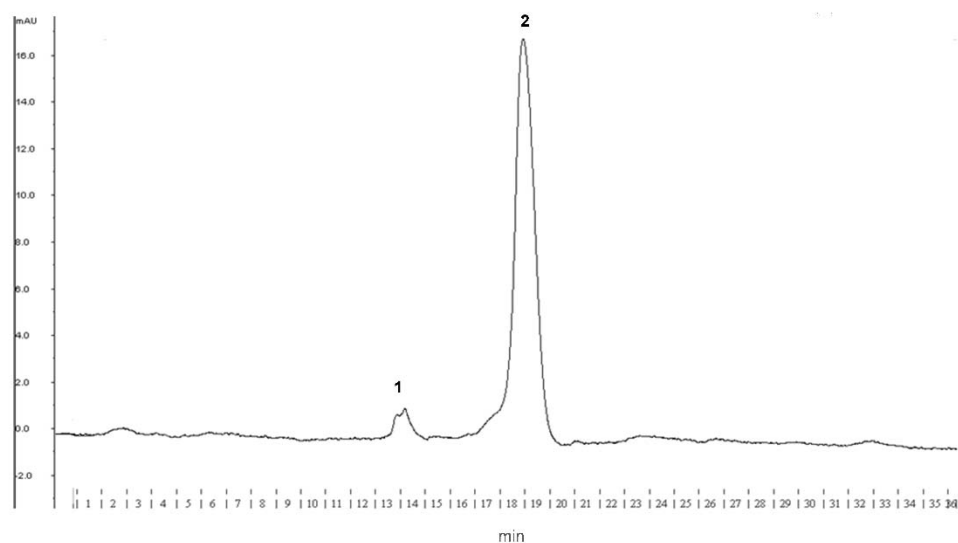

670  
671  
672  
673

**Figure 4.** Size-exclusion chromatography (SEC) profile of fraction 12. Peaks eluted after sample submission to SEC system, carried out on a Superdexpeptide HR 10/30 column, under isocratic conditions, using a 50 mM ammonium acetate solution as eluent. The absorbance was monitored at 280 nm. Fractions were collected automatically every minute for 36 min.

674

675

676

677

678

679

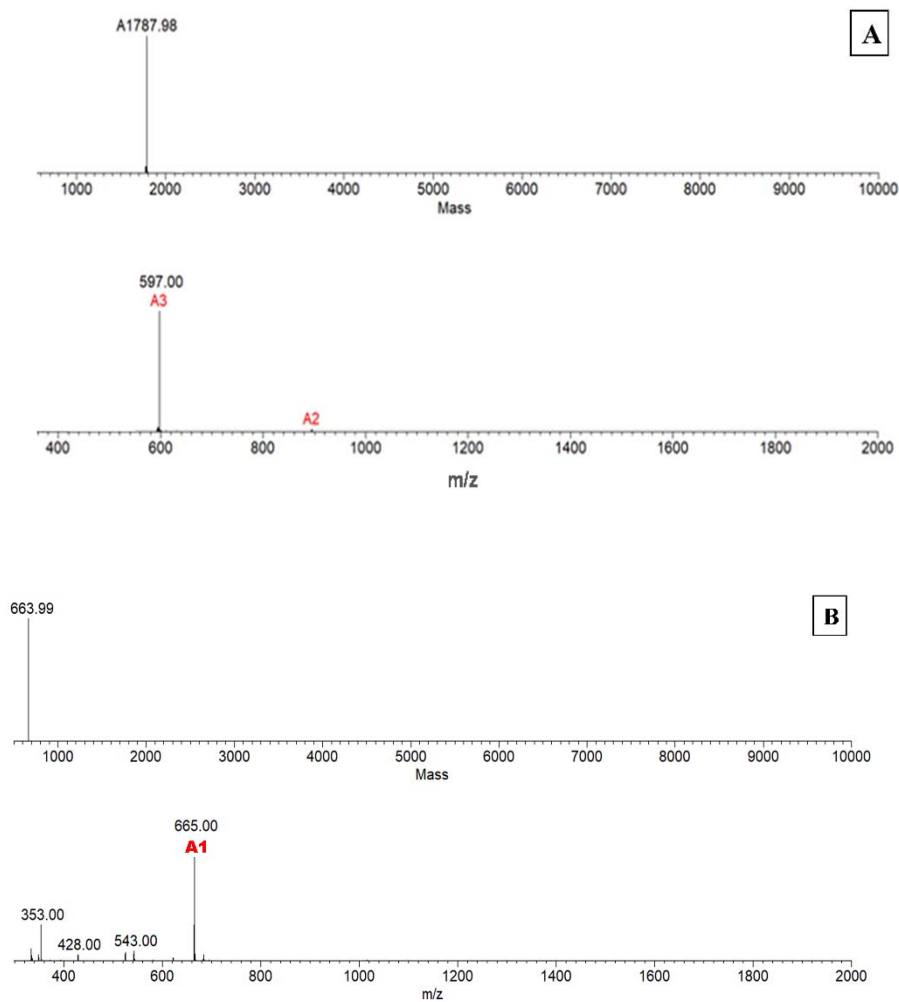

680

681 **Figure 5.** Fraction 12 ion deconvolution and molecular mass generated by Magtran software after fractionation  
682 by SEC. Mass spectrometry analyses revealed a molecular mass of approximately 1,788 Da for Doderlin,  
683 based on mass/charge (m/z) of its double-charged ion  $[M + 2H]^{2+}$ , and triple-charged ion  $[M + 3H]^{3+}$ , where  
684 A2 (895 m/z) correspond to double-charged ion, and A3 (597 m/z) to triple-charged ion (A); A1 (665 m/z)  
685 correspond to single-charged ion  $[M + H]^+$ , revealing the same 664 Da molecule identified before SEC step  
686 (B).

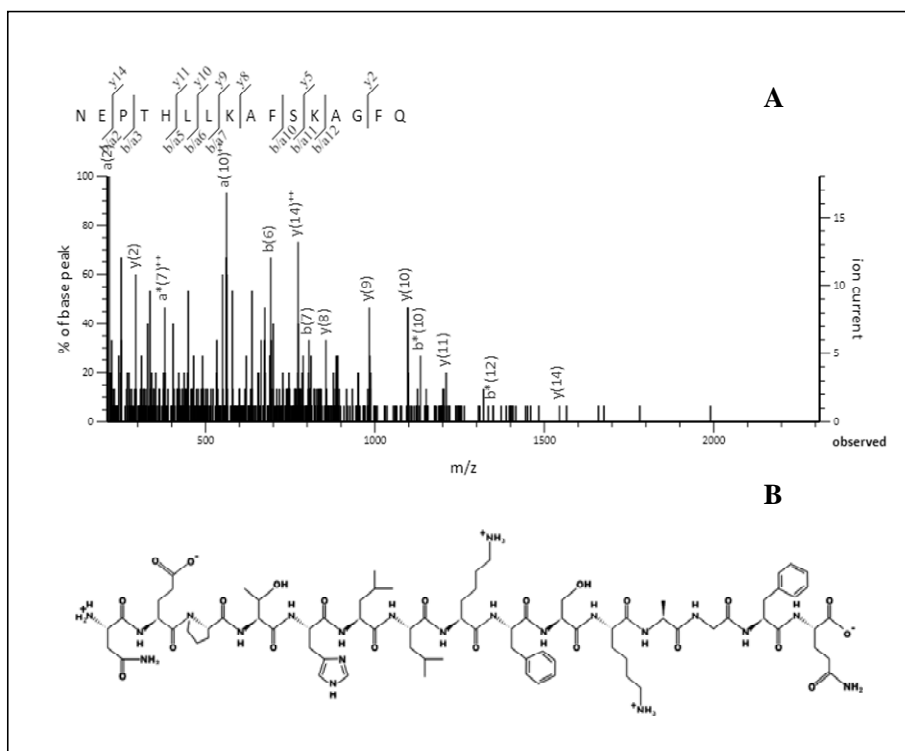

687

688

689

690

691

**Figure 6.** Doderlin peptide sequence generated by Mascot tool. Representative MS/MS spectra generated from CID fragmentation of Doderlin and submitted to Mascot search, revealing the “NEPTHLLKAFSKAGFQ” sequence denoted by deconvolution of “b” and “y” peptide ions (A). The primary structure of the Doderlin peptide generated by Pepdraw software (B).

692

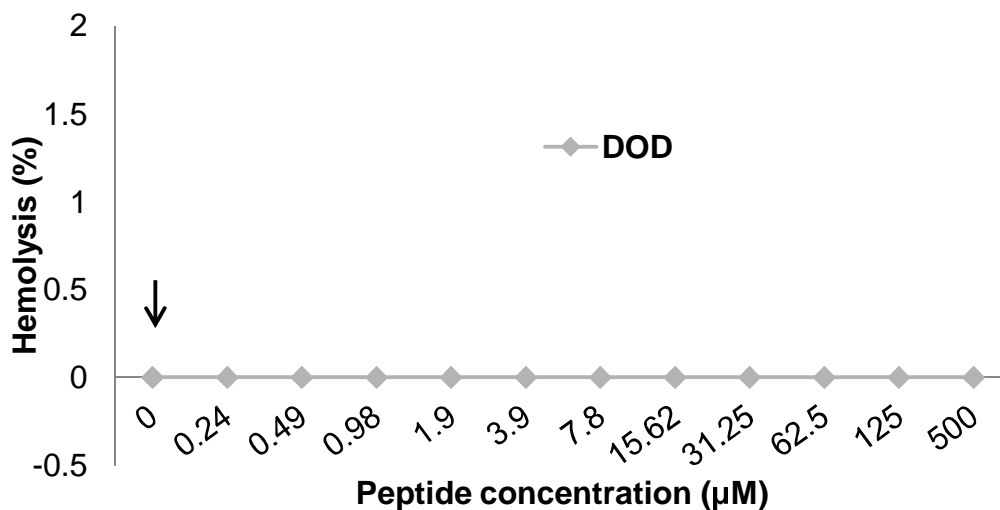

693

694

695

696

697

698

**Figure 7.** Hemolytic effects of Doderlin on human erythrocytes. Doderlin was incubated with human erythrocytes ranging from 0.24 to 500 µM for 3h at 37°C. Negative lysis control (phosphate-buffered saline - PBS) is indicated by the arrow. Positive lysis control (0.1% tritonX-100) is not indicated.



699 **TABLES**

700 **Table 1. Antimicrobial activity of all detected fractions.**

| ACN | Fraction | Microorganism                     |                                   |                                            |                                 |
|-----|----------|-----------------------------------|-----------------------------------|--------------------------------------------|---------------------------------|
|     |          | <i>Micrococcus luteus</i><br>A270 | <i>Escherichia coli</i><br>SBS363 | <i>Pseudomonas aeruginosa</i><br>ATCC27853 | <i>Candida albicans</i><br>MDM8 |
| 5%  | 3        | +                                 | -                                 | -                                          | -                               |
|     | 12       | +                                 | +                                 | +                                          | +                               |
|     | 14       | +                                 | -                                 | +                                          | -                               |
|     | 15       | +                                 | +                                 | -                                          | -                               |
| 40% | 23       | -                                 | +                                 | NT                                         | -                               |
|     | 25       | -                                 | +                                 | NT                                         | -                               |
|     | 29       | +                                 | +                                 | NT                                         | +                               |
|     | 32       | -                                 | +                                 | NT                                         | -                               |

701 (+): Antimicrobial activity. (-): No antimicrobial activity. NT: Not tested.

702 **Table 2. Antimicrobial activity spectrum of chemically synthesized Doderlin.**

|                   | Microorganism                                         | Doderlin |
|-------------------|-------------------------------------------------------|----------|
| Yeasts            | <i>Candida albicans</i> MDM8                          | +        |
|                   | <i>Candida albicans</i> IOC 4558                      | +        |
|                   | <i>Candida tropicalis</i> IOC 4560                    | +        |
|                   | <i>Candida glabrata</i> IOC 4565                      | -        |
|                   | <i>Candida krusei</i> IOC 4559                        | -        |
| Filamentous fungi | <i>Cryptococcus neoformans</i> H99                    | +        |
|                   | <i>Cladosporium herbarium</i> ATCC 26362              | -        |
|                   | <i>Aspergillus niger</i> (bread isolated)             | -        |
|                   | <i>Aspergillus niger</i> A296                         | +        |
|                   | <i>Aspergillus fumigatus</i> (bread isolated)         | -        |
|                   | <i>Beauveria bassiana</i> (mummified spider isolated) | -        |
|                   | <i>Penicillium expansum</i> (bread isolated)          | -        |
|                   | <i>Paecilomyces farinosus</i> IBC 251                 | +        |
| Gram +            | <i>Streptococcus agalactiae</i> ATCC12386             | +        |
|                   | <i>Micrococcus luteus</i> A270                        | +        |
|                   | <i>Staphylococcus aureus</i> ATCC 29213               | +        |
| Gram -            | <i>Pseudomonas aeruginosa</i> ATCC 27853              | +        |
|                   | <i>Pseudomonas aeruginosa</i> PA14                    | -        |
|                   | <i>Escherichia coli</i> DH5-Alfa                      | -        |
|                   | <i>Escherichia coli</i> D31                           | -        |

703 (+): Antimicrobial activity. (-): No antimicrobial activity.

704

705

706

707

708

709 **Table 3. Synthetic Doderlin Minimum inhibitory concentration (MIC).**

| Microorganism                             | MIC <sup>1</sup> range |             |
|-------------------------------------------|------------------------|-------------|
|                                           | μM                     | mg/mL       |
| <i>Candida albicans</i> MDM8              | 50 - 100               | 0.12 - 0.23 |
| <i>Candida albicans</i> IOC 4558          | 50 - 100               | 0.12 - 0.23 |
| <i>Candida tropicalis</i> IOC 4560        | 50 - 100               | 0.12 - 0.23 |
| <i>Cryptococcus neoformans</i> H99        | 50 - 100               | 0.12 - 0.23 |
| <i>Aspergillus niger</i> A296             | 50 - 100               | 0.12 - 0.23 |
| <i>Paecylomyces farinosus</i> IBC 251     | 100 - 200              | 0.23 - 0.46 |
| <i>Streptococcus agalactiae</i> ATCC12386 | 100 - 200              | 0.23 - 0.46 |
| <i>Micrococcus luteus</i> A270            | 25 - 50                | 0.06 - 0.12 |
| <i>Staphylococcus aureus</i> ATCC 29213   | 25 - 50                | 0.06 - 0.12 |
| <i>Pseudomonas aeruginosa</i> ATCC 27853  | 12,5 - 25              | 0.03 - 0.06 |

710 <sup>1</sup>The MIC refers to the minimal peptide concentration without visible cell growth in liquid medium.

711

712 **Table 4. Doderlin's theoretical physicochemical properties and secondary predicted structure.**

| Peptide properties                      |                                    | Secondary structure                                                                  |
|-----------------------------------------|------------------------------------|--------------------------------------------------------------------------------------|
| Sequence                                | NEPTHLLKAFSKAGFQ                   |  |
| Length                                  | 16                                 |                                                                                      |
| Molecular weight                        | 1788.01                            |                                                                                      |
| Theoretical isoelectric point (pI)      | 9.53                               |                                                                                      |
| Net charge                              | +1                                 |                                                                                      |
| Hydrophobicity                          | +18.16 Kcal * mol <sup>-1</sup>    |                                                                                      |
| Molar extinction coefficient (ε)        | 0 M <sup>-1</sup> cm <sup>-1</sup> |                                                                                      |
| Instability index                       | 16.11                              |                                                                                      |
| Aliphatic index                         | 61.25                              |                                                                                      |
| Grand average of hydropathicity (GRAVY) | -0.512                             |                                                                                      |

720 The ProtParam in ExPASy and the Pepcalc tools were used to obtain physicochemical parameters; the I-Tasser  
 721 tool was used to obtain the secondary structure, showing hydrophobic residues in yellow, positive charged in  
 722 red, and negative in green.

723
